# Supplementary material for: MAG induces apoptosis in cerebellar granule neurons through p75NTR demarcating granule layer/white matter boundary
Source: PubMed Central journal article supplement (PMC6768859; doi:10.1038/s41419-019-1970-x), 2019-09-30

# Supplementary Figure 1

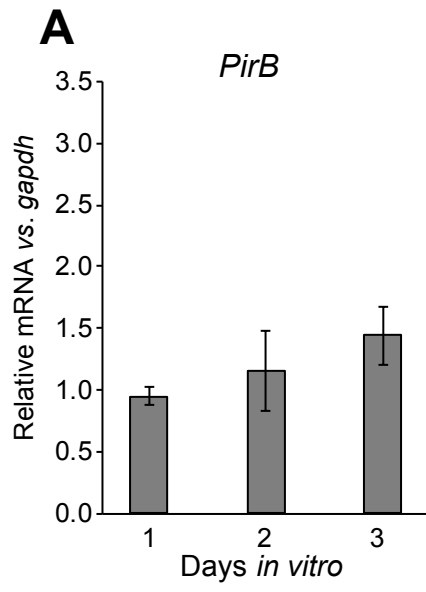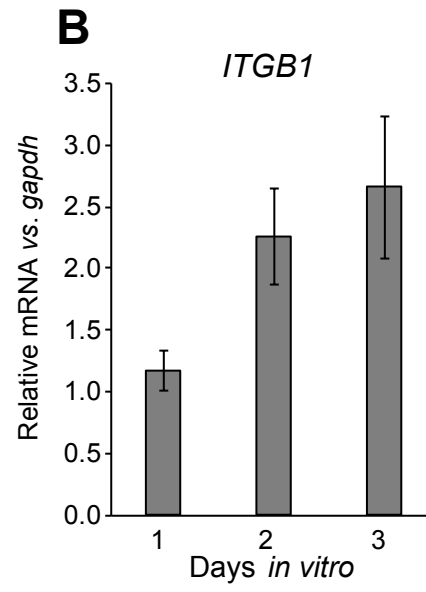

Supplement: 41419_2019_1970_MOESM1_ESM.pdf [file 41419_2019_1970_MOESM1_ESM.pdf]
